# Supplementary material for: Advanced Characterization of DNA Molecules in rAAV Vector Preparations by Single-stranded Virus Next-generation Sequencing
Source: PubMed Central journal article supplement — Mol Ther Nucleic Acids. 2015 Oct 27;4(10):e260–. doi: 10.1038/mtna.2015.32 (PMC4881760; doi:10.1038/mtna.2015.32), 2015-10-27
Supplement: mtna201532x1.pdf [file mtna201532x1.pdf]

## Advanced characterization of DNA molecules in rAAV vector preparations by single-stranded virus next-generation sequencing

Emilie Lecomte\*, Benoît Tournaire\*, Benjamin Cogné, Jean-Baptiste Dupont, Pierre Lindenbaum, Mélanie Martin-Fontaine, Frédéric Broucq, Cécile Robin, Matthias Hebben, Otto-Wilhelm Merten, Véronique Blouin, Achille François, Richard Redon, Philippe Moullier# and Adrien Léger#

### This file includes:

|                                                                                                                                     |    |
|-------------------------------------------------------------------------------------------------------------------------------------|----|
| SUPPLEMENTARY RESULTS.....                                                                                                          | 3  |
| I) Development and validation of SSV-Seq.....                                                                                       | 3  |
| II) Production, purification and characterization of rAAV vectors.....                                                              | 4  |
| III) Development and validation of ContaVect.....                                                                                   | 4  |
| SUPPLEMENTARY FIGURES .....                                                                                                         | 5  |
| Figure S1. Comparative efficiency of DNase on DNA spiked in rAAV production .....                                                   | 5  |
| Figure S2. Control of efficient second strand synthesis.....                                                                        | 6  |
| Figure S3. Selection bias induced by second strand synthesis.....                                                                   | 7  |
| Figure S4. Distribution of DNA fragment sizes after NGS library preparation.....                                                    | 8  |
| Figure S5. Overview of AAV 2/8-CMV-GFP-hTK-BGHpA vectors purification.....                                                          | 9  |
| Figure S6. Characterization of rAAV productions purity and titer.....                                                               | 10 |
| Figure S7. Overview of the protocol followed in this study .....                                                                    | 11 |
| Figure S8. Percentage of single nucleotide variants along rAAV genome for the plasmid control from the internal normalizer .....    | 12 |
| SUPPLEMENTARY TABLES .....                                                                                                          | 13 |
| Table S1. qPCR titration of rAAV and DNA contaminants .....                                                                         | 13 |
| Table S2. Description of the samples analyzed by SSV-Seq.....                                                                       | 14 |
| Table S3. Confusion matrix and mapping prediction rate of ContaVect determined without pre-processing of references.....            | 15 |
| Table S4. Confusion matrix and mapping prediction rate of ContaVect determined with a pre-processing of references.....             | 16 |
| Table S5. Distribution of contaminants in absolute number of reads .....                                                            | 17 |
| Table S6. Distribution of reads in a specific locus of chr15 and in the D-loop of mtDNA .....                                       | 18 |
| Table S7. Comparative distribution of reads in AAV ITR extremities with separated of merged AAV and vector backbone references..... | 19 |
| Table S8. Index sequences.....                                                                                                      | 20 |
| SUPPLEMENTARY MATERIAL AND METHODS.....                                                                                             | 21 |
| rAAV vectors production and purification .....                                                                                      | 21 |
| Vectors production.....                                                                                                             | 21 |
| Cesium Chloride (CsCl) gradients ultracentrifugation purification .....                                                             | 21 |
| Ion-exchange chromatography (IEX) purification.....                                                                                 | 21 |
| Immune affinity chromatography purification.....                                                                                    | 22 |
| Concentration and formulation .....                                                                                                 | 22 |
| Comparative efficacy of DNases .....                                                                                                | 22 |
| DNase treatment.....                                                                                                                | 22 |
| Quant-iT PicoGreen quantification .....                                                                                             | 22 |
| Quality controls of rAAV productions.....                                                                                           | 23 |
| Particle titer.....                                                                                                                 | 23 |
| Vector genome and DNA contaminants quantification .....                                                                             | 23 |
| Protein purity and identity.....                                                                                                    | 23 |
| In process NGS libraries preparation controls .....                                                                                 | 23 |

*Supplementary material*

|                                           |    |
|-------------------------------------------|----|
| Controls of second strand synthesis ..... | 23 |
| DNA quantification .....                  | 23 |
| Control of NGS library preparation .....  | 24 |

## **SUPPLEMENTARY RESULTS**

### **I) Development and validation of SSV-Seq**

To differentiate DNA outside and inside the viral capsid, we compared the ability of several DNases, to digest DNA fragments mixed with rAAV particles. Quantification of residual DNA after DNases treatment showed that the combination of the Baseline-ZERO endonuclease and the Plasmid-Safe exonuclease led to reduction of the amount of DNA exceeding  $1 \times 10^5$  fold (**Fig.S1**). In parallel, the amount of rAAV genome was not affected by the treatment. In addition, for each sample analysed by SSV-Seq, a spike-in control consisting of exogenous DNA (Lambda phage DNA) was used to validate the efficiency of the DNases treatment by analysing mapped reads after NGS (Table S5). Since the exact nature of the rAAV outer capsid and the DNA contaminant is not known, we do not exclude that our spike-in controls would not reproduce DNA strongly tighten to the capsid surface. Even though the DNA remaining after DNases treatment is likely to be almost entirely encapsidated, as a precautionary measure we preferred to use the term “DNase protected. Regarding DNA extraction from rAAV productions, we decided to avoid the use of silica column, known to induce size selection bias and possible DNA contaminations ([Evans GE et al, J Clin Microbiol. 2003 Jul;41\(7\):3452-3.](#)). Instead, we took advantage of a simple procedure based on a modified salting-out precipitation method (Gentra-Puregene blood kit, Qiagen, Venlo, Limburg, Netherlands) and obtained an average yield of rAAV DNA extraction between 50% and 90%.

Since current NGS technologies require a double stranded DNA (dsDNA) input for library preparation, the single stranded rAAV genome had to be converted into dsDNA in vitro (**Fig.1c**). We developed a robust method relying on random priming and DNA Polymerase I with inherent  $3' \rightarrow 5'$  and  $5' \rightarrow 3'$  exonucleases activities. The efficiency of second strand synthesis was controlled by incorporating fluorescein-labelled dUTP (**Fig.S2**). Although a smear of labelled DNA can be observed on Southern immunoblotting, a strong band is visible at the expected rAAV genome size (**Fig.S2a**). The smear indicates a partial fragmentation during the second strand synthesis. Then, the fluorescence intensity was quantified using a fluorescence plate reader (VictorX3, Perkin Elmer, Waltham, MA, USA) and normalized by the mass of DNA in each sample (**Fig.S2b**). All the samples were detected above the negative control, with intensities comparable to the positive control.

Since this protocol might skew relative sequence representation, ratios of rAAV genome copies per plasmid backbone copies were determined using qPCR before and after the second strand synthesis (**Fig.S3, Table S9**). They did not show significant sequence enrichment during this critical step of the protocol.

Lastly, we performed an adapted procedure for NGS library preparation from Kozarewa et al ([Kozarewa and Turner, J Clin Microbiol. 2003 Jul;41\(7\):3452-3.](#)). The samples were sheared by sonication in fragments with a median size of 300 bp, end repaired, A-tailed and adapters were ligated. One of the 2 adapters contains a short DNA barcode, also called index, which is different for each experimental sample. These fragments were amplified by PCR using the PfuUltra II Fusion polymerase (**Fig.1d**). To remove the smallest fragments and the dimers of adapters, each step was followed by a gel free size-selection (SPRIselect, Beckman Coulter, Indianapolis IN, USA). Libraries were controlled after sonication and PCR steps by electrophoresis on Agilent 2100 Bioanalyzer (**Fig.S4**). We obtained PCR products centered on 400 bp (range 250 to 1000 bp) confirming that the upstream steps were correctly performed. Finally, samples were quantified and pooled in equimolar quantities. We also add 1 to 5% of Phi-X DNA

## *Supplementary material*

in the mix to increase sequence diversity for Illumina Sequencing to compensate the high redundancy of the dataset. High throughput sequencing was achieved on an Illumina HiSeq platform (Rapid Run,  $2 \times 101$ bp).

### **II) Production, purification and characterization of rAAV vectors**

We produced an rAAV 2/8 CMVp-eGFP-hygroTK-bGHpA raw batch by transient transfection of adherent HEK-293 cells and purified it either by cesium chloride density gradient (CsCl), affinity chromatography (AVB) or ion exchange chromatography (IEX) (**Fig.S5**). Recombinant AAV preparations were characterized with standard quality controls methods, including extensive qPCR analyses (**Table S9**).

To determine the protein purity of rAAV productions, SDS-PAGE followed by Coomassie blue and silver staining were performed. For all batches, protein purity was higher than 90% as determined using GeneTools software from Coomassie blue staining gel (**Fig.S6a**). However, particles purified by AVB chromatography contained more contaminants (lipids, nucleic acids, glycans or proteins) as shown by silver staining (**Fig.S6b**). In addition, the Coomassie blue staining suggests that rAAV purified by AVB contains more empty particles, as confirmed by an AAV8 titration ELISA (**Fig.S6c**). This is likely to be due to the inability of AVB columns to differentiate between full, malformed and empty particles, while the IEX and CsCl purifications used in this work can enrich in full rAAV particles.

Quantification of the DNA composition by qPCR (**Table S1**) showed that rAAV particles purified by CsCl were less contaminated by the vector plasmid and, to a lesser extent, by the helper plasmid, compared with both chromatographic methods. Altogether, these results emphasize the impact of the purification process on the quality of rAAV batches.

### **III) Development and validation of ContaVect**

A dedicated bioinformatics pipeline (ContaVect) was developed to attribute each sequencing reads to its most likely original sequence (**Fig.1e**). Users can provide several reference sequences for the rAAV genome and the possible DNA contaminants (vector plasmid, helper plasmid, human genome...). If several reference sequences have homologies, it can results in the misattribution of sequencing reads, and/or bad quality mapping, as shown thanks to an artificial dataset mimicking an rAAV production (CMVp-eGFP-hygroTK-bGHpA) in **Table S3**. Indeed, without any preprocessing of the reference sequences we obtained low sensitivity (true positive rate) and specificity (true negative rate) scores for some of the references (< 50%). We developed a fast reference preprocessing module integrated into ContaVect to identify homologies with Blast algorithm and mask them in the less frequent reference, based on a ranking of estimated relative abundance provided by the user. With the preprocessing module, we obtained a much better sensitivity (90.9%, to 100%) and specificity (99.7% to 100%) (**Table S4**). The software is still under active development but the version used for the analyses performed in this study (v0.2) is freely available with an extensive user and developer documentation at <https://github.com/arslide/ContaVect/tree/v0.2>.

## SUPPLEMENTARY FIGURES

**Figure S1. Comparative efficiency of DNase on DNA spiked in rAAV production**

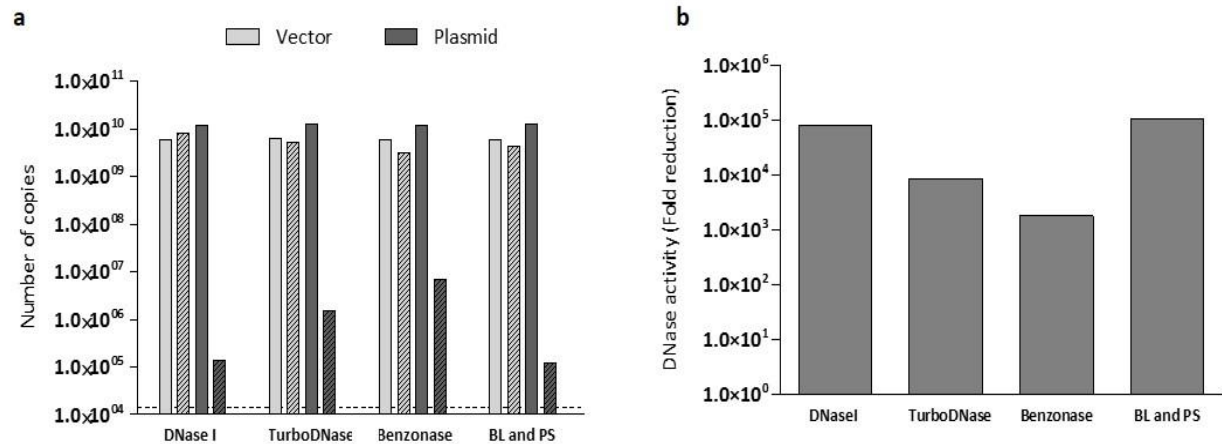

DNase I, TurboDNase, Benzonase or Baseline-ZERO/Plasmid-safe mix (BL and PS) were used to digest  $1 \times 10^{10}$  copies of linearized plasmid mixed with  $1 \times 10^{10}$  rAAV vector particles. After purification, DNase activity was evaluated by qPCR targeting the plasmid and the vector sequences. **(a)** For each DNase condition, the number of copies was represented before and after treatment. Plain bars represent the undigested samples and hatched bars the conditions where the DNase treatment was performed. The dotted line shows the LOQ ( $1.4 \times 10^4$  copies). **(b)** DNase activity represented as fold reduction of plasmid after DNase treatment.

**Figure S2. Control of efficient second strand synthesis**

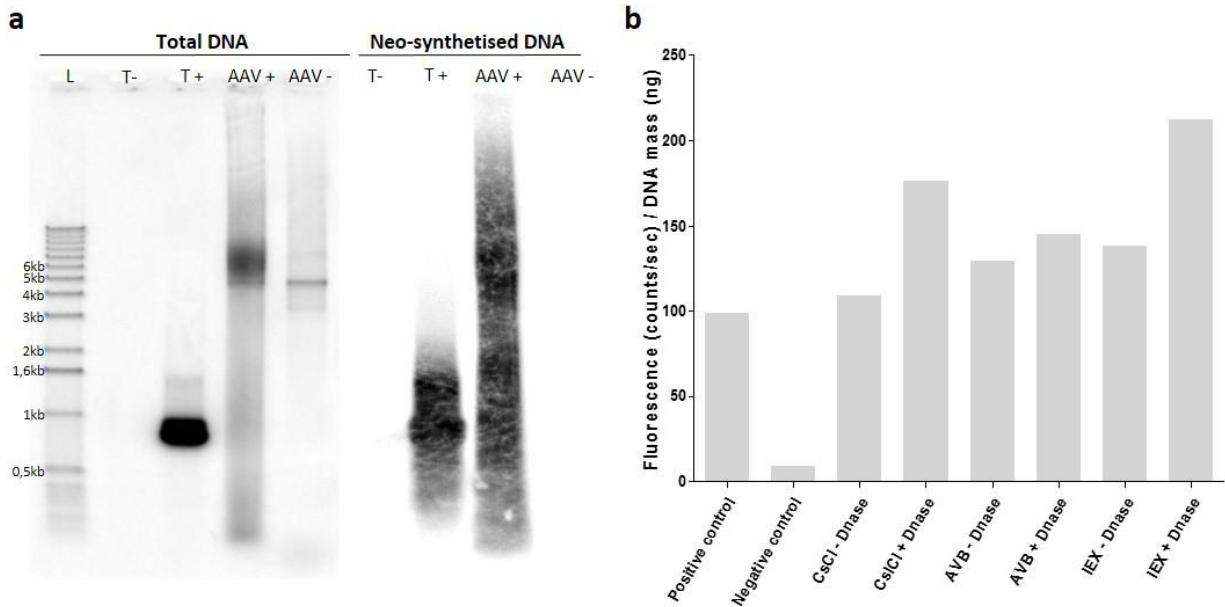

The efficiency of the second strand synthesis was controlled by adding a fluorescein-12 labelled dUTP, then evaluating its incorporation in the neo-synthesized DNA qualitatively (Southern Immunoblot) and quantitatively (fluorimetry). **(a)** Anti-fluorescein immunoblot performed from the rAAV2/8-CMVp-eGFP-hygroTK-bGHpA preparation purified by AVB chromatography, following SSV-Seq protocol until the second strand synthesis with fluorescein-12-dUTP. Total DNA was detected using GelRed staining. The negative control (T-) contained only water and the positive control (T+) is a 780 bp DNA fragment labelled by PCR with fluorescein-12-dUTP. The experimental samples AAV+ and AAV- were processed according to the same protocol except that no DNA Pol I was added during the second strand synthesis of the AAV-. L: 1kb Ladder (Life technologies). **(b)** Fluorescence intensities of rAAV preparations quantified using Perkin Elmer Victor X3 in the 6 experimental samples described in the manuscript. Results were normalised by converting the number of copies after second strand synthesis obtained by qPCR into total DNA mass. The positive control is the same than in **(a)** and the negative control is a plasmid fragment containing the rAAV genome that underwent the protocol but without DNA Pol I.

Figure S3. Selection bias induced by second strand synthesis

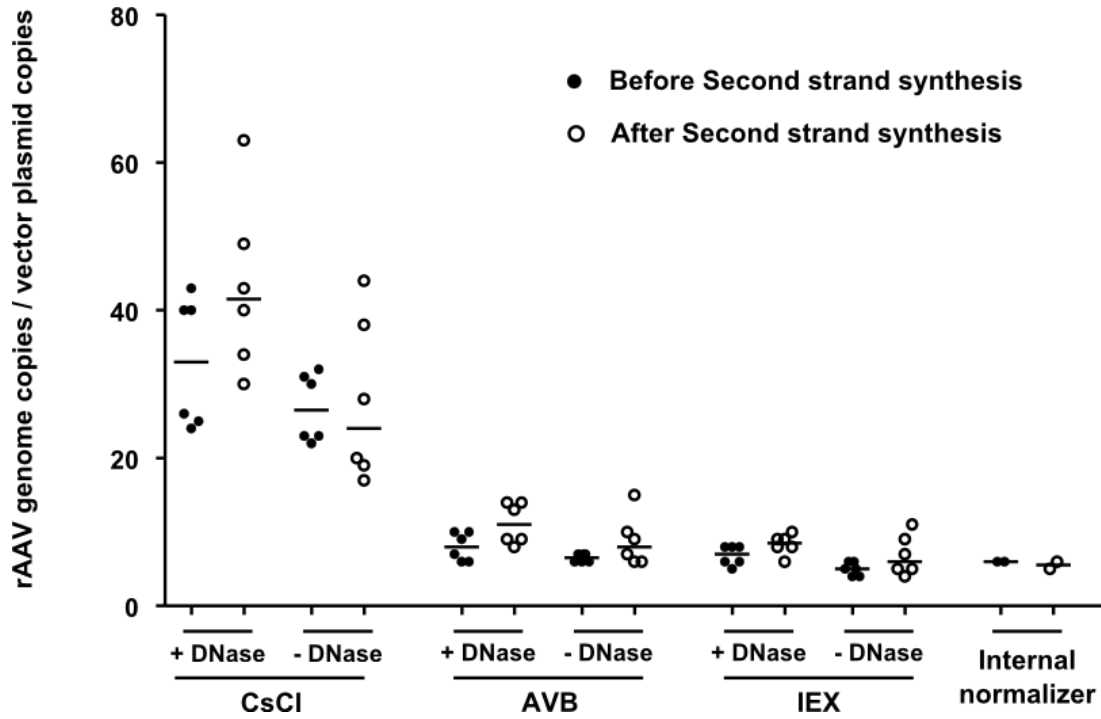

To evaluate the possible selection/amplification bias due to the second strand synthesis, we calculated a ratio between the rAAV genome copy number and vector plasmid copy number, in process before and after this critical step. The rAAV genome and vector plasmid copy numbers were determined using qPCR targeting the bGH polyadenylation signal (**Table S9**, BGH pA) and the kanamycin resistance gene (**Table S9**, Kana R), respectively. No significant difference was found for all experimental samples when comparing the ratio before and after second strand synthesis. Horizontal lines represent the medians. n=6 for each rAAV2/8-CMVp-eGFP-hygroTK-bGHpA samples. n=2 for the internal normalizer and the control. Statistics: two tailed Mann-Whitney's U-test, Confidence interval = 95%.

Figure S4. Distribution of DNA fragment sizes after NGS library preparation

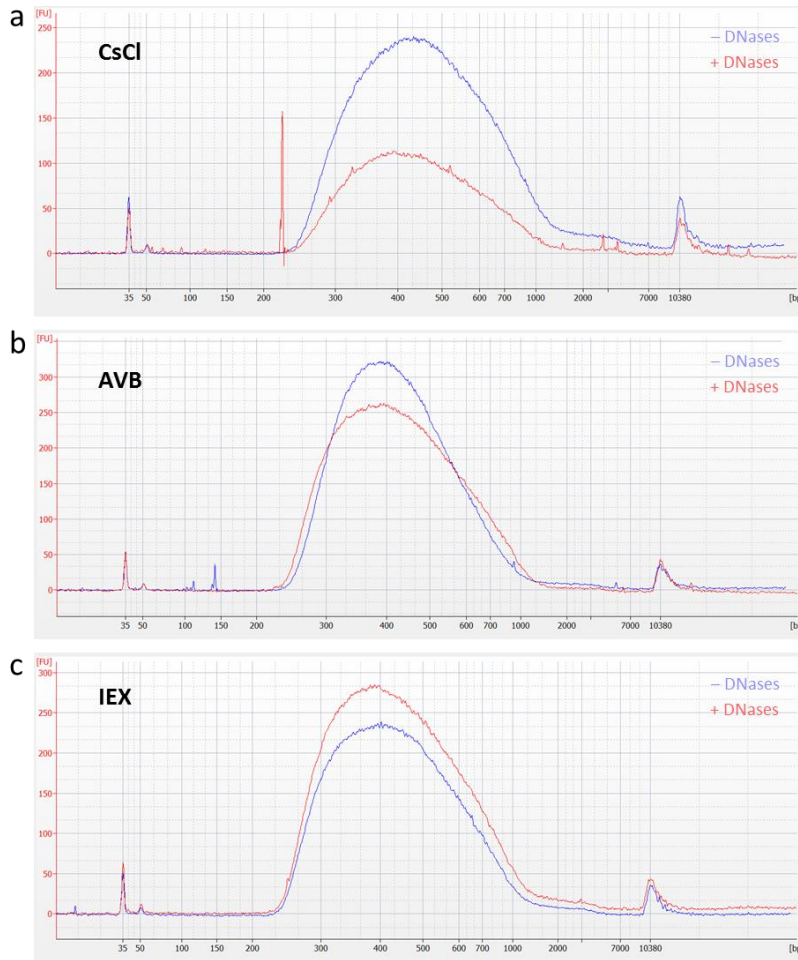

The distribution of DNA fragment sizes was determined at the end of the NGS library preparation protocol by the Agilent 2100 Bioanalyzer system using High sensitivity DNA chip. As shown for each of the 6 rAAV sample libraries prepared for this study, fragments below 250 bp were eliminated by the successive washing steps.



Figure S5. Overview of AAV 2/8-CMV-GFP-hTK-BGHpA vectors purification

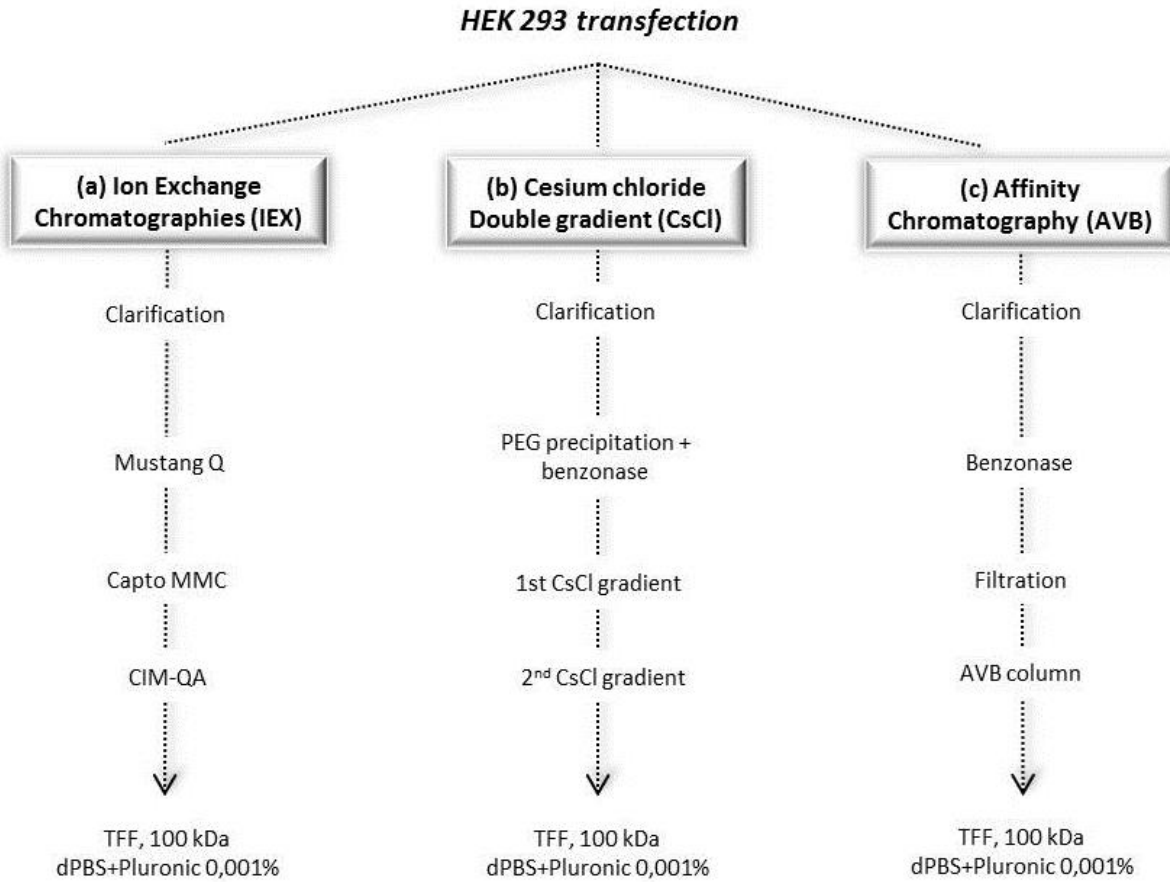

After HEK-293 cells transient transfection, production was splitted in three parts. Batch (a) was clarified by filtration (Merck-Millipore), purified by three different ion exchange chromatography (IEX) steps: anionic membrane (Pall Corporation), cationic multimodal (GE Healthcare Life sciences) and anionic monolith (Bia Separations) columns. Batch (b) was clarified by centrifugation, precipitated with a polyethylene glycol (PEG), treated with benzonase, and purified by double Cesium Chloride gradient (CsCl). Batch (c) was clarified by centrifugation, treated with benzonase, and purified by immune-affinity chromatography (GE Healthcare Life sciences). All of the vectors were concentrated and formulated in DPBS containing 0.001% Pluronic F-68 by tangential flow filtration (TFF) using a fibre cartridge of 100 kDa (GE Healthcare Life sciences).

Figure S6. Characterization of rAAV productions purity and titer

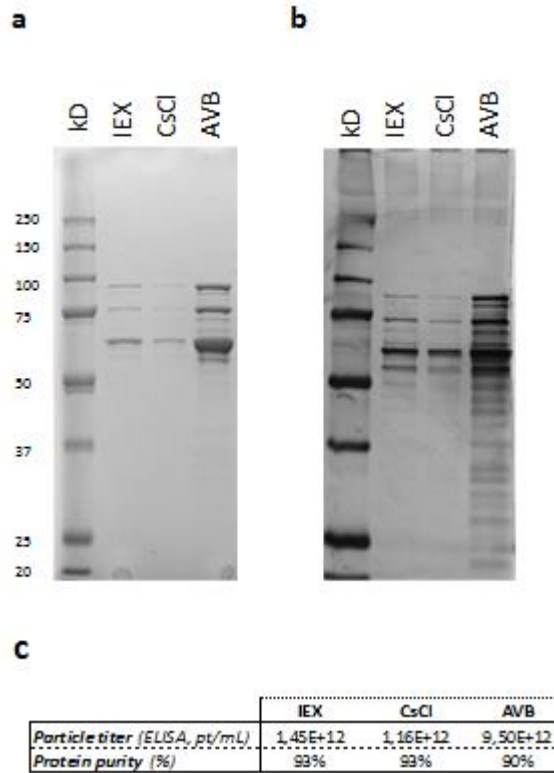

The protein purity of rAAV preparation purified by IEX, CsCl and AVB methods was evaluated by running SDS-PAGE gels and staining with (a) Coomassie blue ( $1 \times 10^{11}$  vector genomes/sample) or (b) silver staining ( $2 \times 10^{10}$  vector genomes/sample). kD: BenchMark protein ladder in kiloDalton (Invitrogen) (c) The overall protein purity was determined using Coomassie blue staining and the vector particle titer was evaluated using an anti-AAV8 capsid ELISA assay.

Figure S7. Overview of the protocol followed in this study

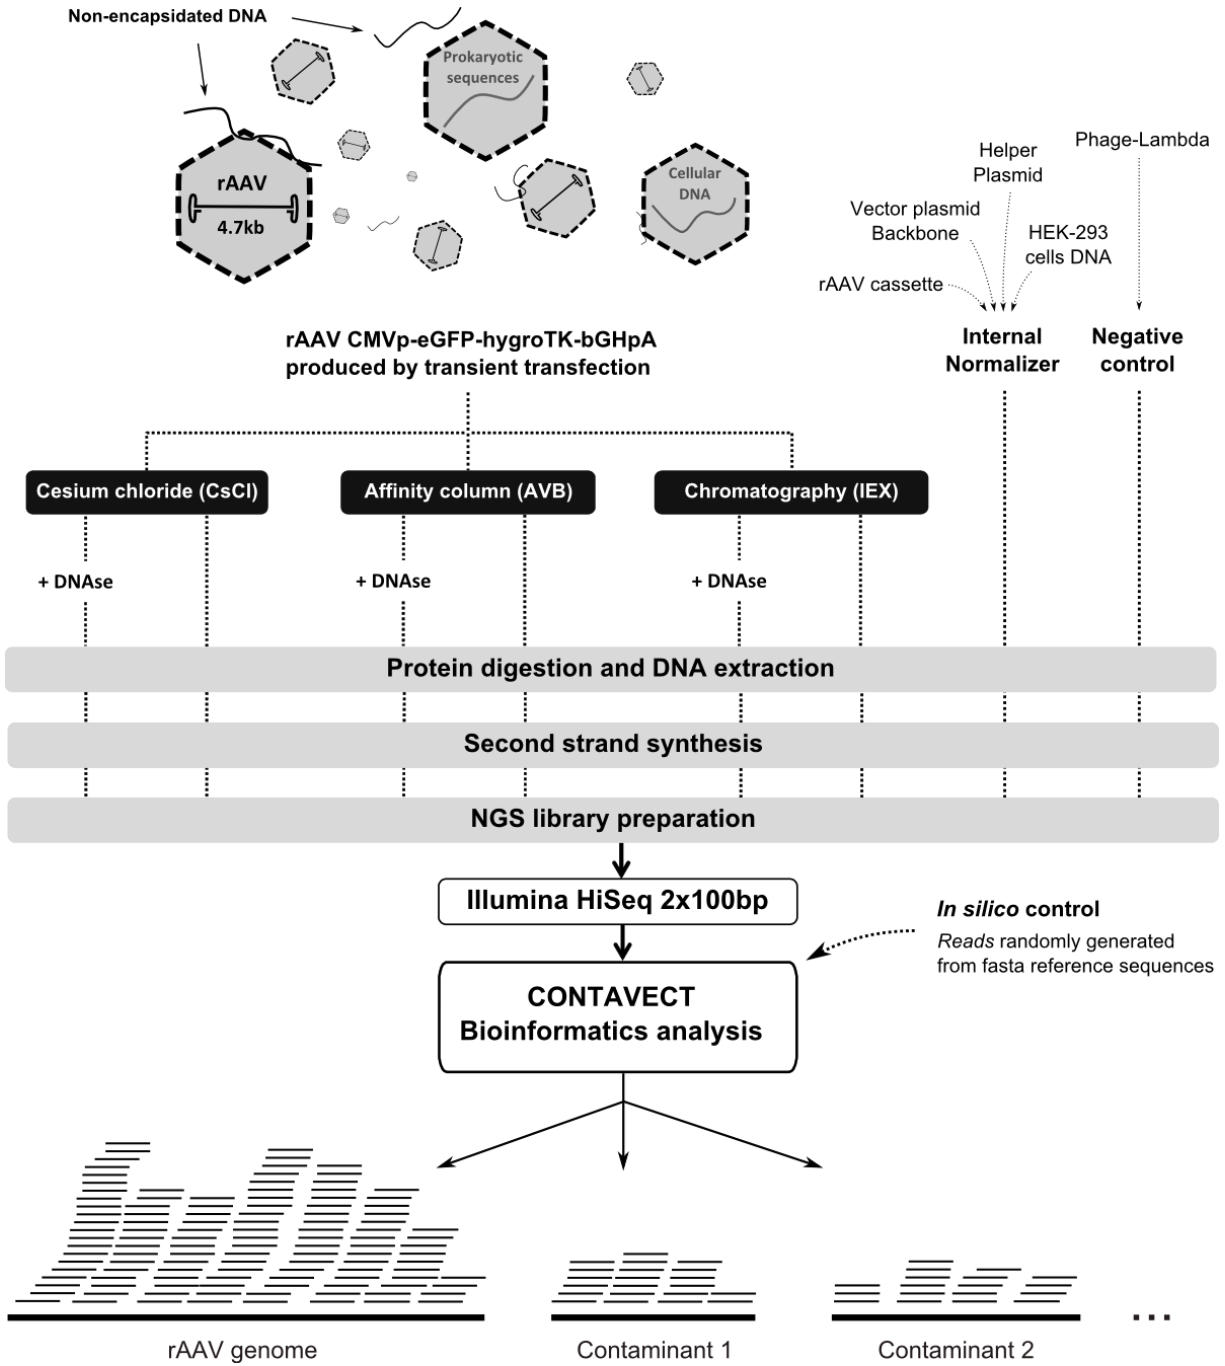

**Figure S8. Percentage of single nucleotide variants along rAAV genome for the plasmid control from the internal normalizer**

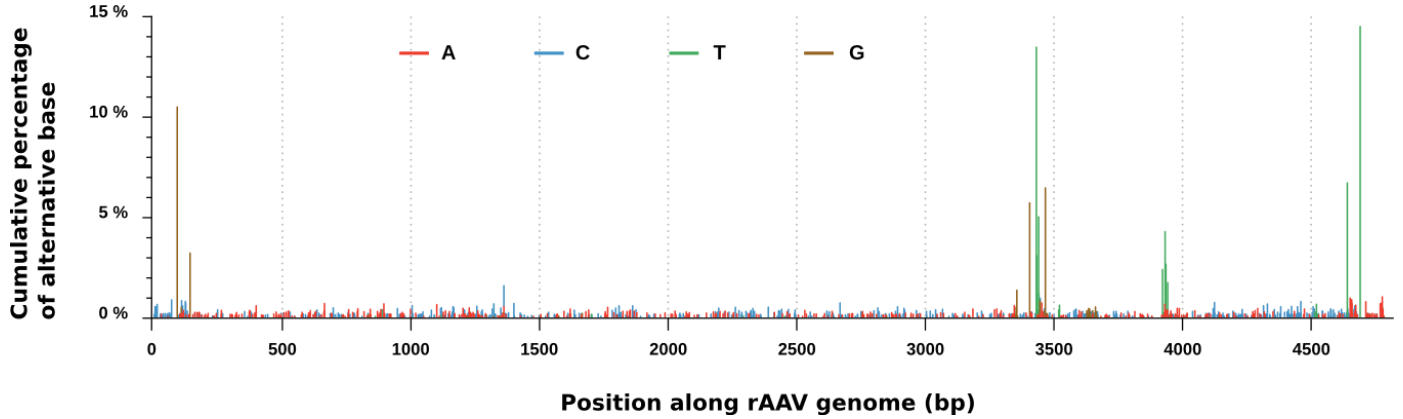

Cumulative percentage of alternative base A (red), C (blue), T (green) and G (brown) compared with the reference sequence for each nucleotide position along rAAV genome in base pair. When several variants were found at the same nucleotide position, variant contributions were stacked. SNVs are represented on the graph if they were found in at least 1 of the 2 technical replicates of the internal normalizer control.

## SUPPLEMENTARY TABLES

Table S1. qPCR titration of rAAV and DNA contaminants

| Reference               | Reference length (pb) | PCR target | Target length (pb) | CsCl - DNase (cp/ml) | CsCl + DNase (cp/ml) | AVB - DNase (cp/ml) | AVB + DNase (cp/ml) | IEX - DNase (cp/ml) | IEX + DNase (cp/ml) |
|-------------------------|-----------------------|------------|--------------------|----------------------|----------------------|---------------------|---------------------|---------------------|---------------------|
| rAAV genome             | 4794                  | ITR2       | 62                 | 2.61E+12             | 2.67E+12             | 4.49E+12            | 5.20E+12            | 2.07E+12            | 2.19E+12            |
|                         |                       | CMVp       | 124                | 7.05E+11             | 5.41E+11             | 9.49E+11            | 8.74E+11            | 4.77E+11            | 3.88E+11            |
|                         |                       | BGHpA      | 69                 | 5.00E+11             | 4.47E+11             | 6.79E+11            | 6.71E+11            | 2.96E+11            | 2.96E+11            |
|                         |                       | GFP 1      | 74                 | 5.81E+11             | 5.17E+11             | 7.62E+11            | 6.83E+11            | 3.42E+11            | 3.45E+11            |
|                         |                       | GFP 2      | 66                 | 6.62E+11             | 6.04E+11             | 9.21E+11            | 8.41E+11            | 3.78E+11            | 3.79E+11            |
| Vector plasmid backbone | 2209                  | KanaR      | 147                | 1.14E+10             | 9.13E+09             | 6.33E+10            | 6.09E+10            | 3.71E+10            | 3.17E+10            |
| Helper plasmid          | 22757                 | Cap8       | 81                 | 7.31E+06             | 5.97E+06             | 3.83E+07            | 3.74E+07            | 1.35E+07            | 1.35E+07            |
|                         |                       | Rep2       | 75                 | 8.72E+06             | 8.73E+06             | 4.62E+07            | 3.05E+07            | 1.72E+07            | 1.69E+07            |
|                         |                       | E4         | 67                 | 7.69E+06             | 6.67E+06             | 3.56E+07            | 3.51E+07            | 1.58E+07            | 1.29E+07            |
| Human genome            | 3099750718            | human ALB1 | 100                | <LOQ                 | <LOQ                 | <LOQ                | <LOQ                | <LOQ                | <LOQ                |

rAAV productions were titered by qPCR targeting different sequences present in the rAAV genome. DNA contaminants from the vector plasmid backbone, the helper plasmid and the human genome were quantified using sequence specific targets. Similar to the SSV-Seq protocol, encapsidated and non-encapsidated targets were differentiated by our DNases treatment. The quantity of each target was expressed in copy number per mL of final rAAV product. For human genome, the copy number was below our limit of quantification in all of the conditions ( $3 \times 10^3$  copies/mL).

**Table S2. Description of the samples analyzed by SSV-Seq.**

| Sample Name                | Composition (estimated number of copies)                                                                                                                                           | DNase treatment | Mean read quality | Number of reads |
|----------------------------|------------------------------------------------------------------------------------------------------------------------------------------------------------------------------------|-----------------|-------------------|-----------------|
| <b>AAV CsCl+</b>           | AAV preparation CsCl purification ( $2 \times 10^{11}$ cp of rAAV = 484 ng) + phage $\lambda$ DNA (24.2ng)                                                                         | +               | 34.74             | 9 658 441       |
|                            |                                                                                                                                                                                    |                 | 35.18             | 7 674 203       |
| <b>AAV CsCl-</b>           |                                                                                                                                                                                    | -               | 34.9              | 7 904 503       |
|                            |                                                                                                                                                                                    |                 | 35.36             | 8 047 430       |
| <b>AAV AVB+</b>            | AAV preparation AVB purification ( $2 \times 10^{11}$ cp of rAAV = 484 ng) + phage $\lambda$ DNA (24.2ng)                                                                          | +               | 34.68             | 6 658 586       |
|                            |                                                                                                                                                                                    |                 | 35.51             | 8 046 244       |
| <b>AAV AVB-</b>            |                                                                                                                                                                                    | -               | 34.99             | 7 906 618       |
|                            |                                                                                                                                                                                    |                 | 35.74             | 6 340 719       |
| <b>AAV IEX+</b>            | AAV preparation IEX purification ( $2 \times 10^{11}$ cp of rAAV = 484 ng) + phage $\lambda$ DNA (24.2ng)                                                                          | +               | 34.79             | 8 810 295       |
|                            |                                                                                                                                                                                    |                 | 35.45             | 6 699 569       |
| <b>AAV IEX-</b>            |                                                                                                                                                                                    | -               | 34.91             | 9 028 587       |
|                            |                                                                                                                                                                                    |                 | 35.47             | 7 826 906       |
| <b>Negative control</b>    | phage $\lambda$ DNA (484 ng)                                                                                                                                                       | +               | 35.72             | 8 523 711       |
|                            |                                                                                                                                                                                    |                 | 36.52             | 6 717 691       |
| <b>Internal normalizer</b> | rAAV genome ( $2 \times 10^{11}$ cp) + vector plasmid backbone ( $1 \times 10^{10}$ cp) + Helper plasmid ( $4 \times 10^9$ cp) + sonicated HEK-293 cells DNA ( $1 \times 10^2$ cp) | -               | 35.04             | 7 574 472       |
|                            |                                                                                                                                                                                    |                 | 35.65             | 6 786 931       |

Each sample was analyzed in 2 technical replicates. The estimated composition of the samples corresponds to the number of copies (cp) determined by qPCR titrations (when available) or by microspectrophotometry. The number of reads and mean PHRED quality indicates values for raw data after sample de-multiplexing but before any quality filtering.

**Table S3. Confusion matrix and mapping prediction rate of ContaVect determined without pre-processing of references**

|          |          | EXPECTED |          |        |     |       |          | Total    |
|----------|----------|----------|----------|--------|-----|-------|----------|----------|
|          |          | AAV      | Backbone | Helper | Ad5 | Human | Unmapped |          |
| OBSERVED | AAV      | 14000000 | 0        | 0      | 0   | 0     | 0        | 14000000 |
|          | Backbone | 0        | 206120   | 2      | 0   | 0     | 0        | 206122   |
|          | Helper   | 0        | 204      | 4752   | 0   | 0     | 0        | 4956     |
|          | Ad5      | 0        | 0        | 0      | 10  | 0     | 0        | 10       |
|          | Human    | 0        | 0        | 0      | 0   | 28952 | 0        | 28952    |
|          | Unmapped | 0        | 213676   | 246    | 0   | 572   | 200000   | 414494   |
|          | Total    | 14000000 | 420000   | 5000   | 10  | 29524 | 200000   |          |

| Percentages                 | AAV     | Backbone | Helper | Ad5     | Human   | Unmapped |
|-----------------------------|---------|----------|--------|---------|---------|----------|
| True positive (sensitivity) | 100.00% | 49.08%   | 95.04% | 100.00% | 98.06%  | 100.00%  |
| False negative              | 0.00%   | 50.92%   | 4.96%  | 0.00%   | 1.94%   | 0.00%    |
| True negative (specificity) | 100.00% | 100.00%  | 95.88% | 100.00% | 100.00% | 48.25%   |
| False positive              | 0.00%   | 0.00%    | 4.12%  | 0.00%   | 0.00%   | 51.75%   |

Confusion Matrix and mapping prediction rates were obtained with an artificial dataset mimicking an rAAV production CMVp-eGFP-hygroTK-bGHPA generated using Fastq Control Sampler.

**Upper table.** Reads from rAAV, Backbone, Helper, Ad5, Human references were generated from the reference fasta sequences (see material and method section) and the read from the “unmapped” reference from a randomly generated sequence. The numbers of reads generated per reference are indicated in the lower row in the corresponding columns. The last columns summarize the number of read attributed to each reference after mapping with ContaVect, without the reference pre-processing module. A green cell indicates a correct assignment, while a red cell corresponds to mapping errors.

**Lower table.** The percentages of true positives, true negatives, false positives and false negatives were calculated from results obtained in the upper table for each reference.

**Table S4. Confusion matrix and mapping prediction rate of ContaVect determined with a pre-processing of references**

|          |          | EXPECTED |          |        |     |       |          | Total    |
|----------|----------|----------|----------|--------|-----|-------|----------|----------|
|          |          | AAV      | Backbone | Helper | Ad5 | Human | Unmapped |          |
| OBSERVED | AAV      | 14000000 | 0        | 0      | 0   | 0     | 0        | 14000000 |
|          | Backbone | 0        | 420000   | 455    | 0   | 0     | 0        | 420455   |
|          | Helper   | 0        | 0        | 4543   | 0   | 0     | 0        | 4543     |
|          | Ad5      | 0        | 0        | 0      | 10  | 0     | 0        | 10       |
|          | Human    | 0        | 0        | 0      | 0   | 28952 | 0        | 28952    |
|          | Unmapped | 0        | 0        | 2      | 0   | 572   | 200000   | 200574   |
|          | Total    | 14000000 | 420000   | 5000   | 10  | 29524 | 200000   |          |

| Percentages                 | AAV     | Backbone | Helper  | Ad5     | Human   | Unmapped |
|-----------------------------|---------|----------|---------|---------|---------|----------|
| True positive (sensitivity) | 100.00% | 100.00%  | 90.86%  | 100.00% | 98.06%  | 100.00%  |
| False negative              | 0.00%   | 0.00%    | 9.14%   | 0.00%   | 1.94%   | 0.00%    |
| True negative (specificity) | 100.00% | 99.89%   | 100.00% | 100.00% | 100.00% | 99.71%   |
| False positive              | 0.00%   | 0.11%    | 0.00%   | 0.00%   | 0.00%   | 0.29%    |

Confusion Matrix and mapping prediction rates were obtained with an artificial dataset mimicking an rAAV production CMVp-eGFP-hygroTK-bGHpA generated using Fastq Control Sampler.

**Upper table.** Reads from rAAV, Backbone, Helper, Ad5, Human references were generated from the reference fasta sequences (see material and method section) and the read from the “unmapped” reference from a randomly generated sequence. The numbers of reads generated per reference are indicated in the lower row in the corresponding columns. The last columns summarize the number of read attributed to each reference after mapping with ContaVect, using the reference pre-processing module. A green cell indicates a correct assignment, while a red cell corresponds to mapping errors.

**Lower table.** The percentages of true positives, true negatives, false positives and false negatives were calculated from results obtained in the upper table for each reference.



**Table S5. Distribution of contaminants in absolute number of reads**

| Reference name          | Length (bp)   | Negative control | Internal Normalizer | CsCl - DNase | CsCl + DNase | AVB - DNase | AVB + DNase | IEX - DNase | IEX + DNase |
|-------------------------|---------------|------------------|---------------------|--------------|--------------|-------------|-------------|-------------|-------------|
| Phi X174                | 5 386         | 155 022          | 131 849             | 157 572      | 214 214      | 137 587     | 127 001     | 174 238     | 201 407     |
|                         |               | 18 440           | 21 624              | 25 431       | 26 479       | 22 447      | 31 976      | 30 181      | 20 004      |
| λ phage                 | 48 502        | 15 820 832       | 1 993               | 1 317 316    | 509          | 1 567 573   | 270         | 1 863 260   | 631         |
|                         |               | 12 524 254       | 838                 | 1 118 877    | 357          | 1 074 966   | 515         | 1 284 740   | 401         |
| rAAV genome             | 4 794         | 17 217           | 8 014 026           | 12 513 125   | 16 768 399   | 11 820 182  | 11 207 153  | 13 302 866  | 14 536 121  |
|                         |               | 1 205            | 7 996 633           | 12 848 053   | 13 281 337   | 9 729 696   | 13 446 419  | 11 698 973  | 11 248 707  |
| Vector plasmid backbone | 2 209         | 913              | 1 138 694           | 148 331      | 142 147      | 533 912     | 348 283     | 737 458     | 815 318     |
|                         |               | 366              | 1 031 197           | 167 598      | 116 191      | 460 698     | 485 013     | 745 067     | 491 676     |
| Helper plasmid          | 22 757        | 54               | 3 937 978           | 1 472        | 1 763        | 8 119       | 5 267       | 7 167       | 7 807       |
|                         |               | 22               | 628 280             | 1 622        | 1 348        | 6 671       | 8 028       | 6 601       | 9 321       |
| Ad5 in 293              | 4 344         | 0                | 2                   | 0            | 0            | 0           | 0           | 0           | 0           |
|                         |               | 2                | 4                   | 0            | 0            | 2           | 2           | 0           | 0           |
| human genome            | 3 099 750 718 | 2 292            | 196 882             | 13 210       | 6 361        | 36 122      | 24 708      | 28 946      | 26 333      |
|                         |               | 3140             | 263 076             | 17 749       | 5 804        | 30 671      | 39 382      | 28 913      | 19 637      |
| Unmapped                |               | 68 642           | 374 962             | 99 746       | 101 967      | 213 741     | 143 356     | 182 021     | 171 241     |
|                         |               | 203 077          | 2 414 472           | 260 792      | 210 724      | 287 211     | 537 789     | 319 873     | 292 122     |
| Total                   |               | 16 064 972       | 13 796 386          | 14 250 772   | 17 235 360   | 14 317 236  | 11 856 038  | 16 295 956  | 15 758 858  |
|                         |               | 12 750 506       | 12 356 124          | 14 440 122   | 13 642 240   | 11 612 362  | 14 549 124  | 14 114 348  | 12 081 868  |

The number of reads assigned by ContaVect to each reference, including technical decoy references and unmapped reads, is indicated for the 2 technical replicates of each sample. The size of references in base pairs (bp) is indicated in the second column of the table.

**Table S6. Distribution of reads in a specific locus of chr15 and in the D-loop of mtDNA**

| Sample name         | Read count |        | % per human genome read |        | % per total mapped read |         |
|---------------------|------------|--------|-------------------------|--------|-------------------------|---------|
|                     | chr15 gene | d-loop | chr15 gene              | d-loop | chr15 gene              | d-loop  |
| Cont Neg            | 0          | 0      | 0.00%                   | 0.000% | 0.000%                  | 0.0000% |
|                     | 0          | 0      | 0.00%                   | 0.000% | 0.000%                  | 0.0000% |
| Internal Normalizer | 0          | 41     | 0.00%                   | 0.021% | 0.000%                  | 0.0003% |
|                     | 89         | 29     | 0.03%                   | 0.011% | 0.001%                  | 0.0003% |
| CsCl - DNase        | 1          | 237    | 0.01%                   | 1.794% | 0.000%                  | 0.0019% |
|                     | 0          | 154    | 0.00%                   | 0.868% | 0.000%                  | 0.0012% |
| CsCl + DNase        | 2          | 14     | 0.03%                   | 0.220% | 0.000%                  | 0.0001% |
|                     | 0          | 4      | 0.00%                   | 0.069% | 0.000%                  | 0.0000% |
| AVB - DNase         | 6763       | 1      | 18.72%                  | 0.003% | 0.055%                  | 0.0000% |
|                     | 5332       | 2      | 17.38%                  | 0.007% | 0.052%                  | 0.0000% |
| AVB + DNase         | 4466       | 3      | 18.08%                  | 0.012% | 0.039%                  | 0.0000% |
|                     | 7094       | 2      | 18.01%                  | 0.005% | 0.051%                  | 0.0000% |
| IEX - DNase         | 0          | 4      | 0.00%                   | 0.014% | 0.000%                  | 0.0000% |
|                     | 0          | 1      | 0.00%                   | 0.003% | 0.000%                  | 0.0000% |
| IEX + DNase         | 0          | 0      | 0.00%                   | 0.000% | 0.000%                  | 0.0000% |
|                     | 0          | 1      | 0.00%                   | 0.005% | 0.000%                  | 0.0000% |

The number of reads found in a specific locus of chr15 (not disclosed due to confidentiality concerns) and in the D-loop of mtDNA (human genome GRCh38 MT: 16,078 - 16,561), is indicated in the 2nd and 3rd columns of the table for the 2 technical replicates of each sample. The 4th and 5th columns contain the percentages of the reads compared with all of the reads found in the human genome, and the 2 last columns the percentage compared with all of the reads mapped, regardless of the reference. Red cells represent samples for which there is a higher contamination.

**Table S7. Comparative distribution of reads in AAV ITR extremities with separated of merged AAV and vector backbone references**

|                     | Separated AAV and Backbone references |              |                | Merged AAV and Backbone references |              |                |
|---------------------|---------------------------------------|--------------|----------------|------------------------------------|--------------|----------------|
|                     | reads in ITR                          | reads in AAV | % reads in ITR | reads in ITR                       | reads in AAV | % reads in ITR |
| Cont Neg            | 612                                   | 17217        | 3.55%          | 903                                | 17901        | 5.04%          |
|                     | 46                                    | 1205         | 3.82%          | 63                                 | 1240         | 5.08%          |
| Internal Normalizer | 373242                                | 8014026      | 4.66%          | 516768                             | 8229781      | 6.28%          |
|                     | 377024                                | 7996633      | 4.71%          | 531094                             | 8228037      | 6.45%          |
| CsCl - DNase        | 393995                                | 12513125     | 3.15%          | 542707                             | 12751338     | 4.26%          |
|                     | 497911                                | 12848053     | 3.88%          | 666227                             | 13096780     | 5.09%          |
| CsCl + DNase        | 495941                                | 16768399     | 2.96%          | 655128                             | 17183806     | 3.81%          |
|                     | 519122                                | 13281337     | 3.91%          | 664758                             | 13624315     | 4.88%          |
| AVB - DNase         | 456315                                | 11820182     | 3.86%          | 691500                             | 12198959     | 5.67%          |
|                     | 507244                                | 9729696      | 5.21%          | 719640                             | 10056082     | 7.16%          |
| AVB + DNase         | 464122                                | 11207153     | 4.14%          | 660816                             | 11606326     | 5.69%          |
|                     | 943264                                | 13446419     | 7.01%          | 1351071                            | 14122346     | 9.57%          |
| IEX - DNase         | 437581                                | 13302866     | 3.29%          | 709229                             | 13744228     | 5.16%          |
|                     | 598961                                | 11698973     | 5.12%          | 900234                             | 12151130     | 7.41%          |
| IEX + DNase         | 559802                                | 14536121     | 3.85%          | 821117                             | 15116144     | 5.43%          |
|                     | 559588                                | 11248707     | 4.97%          | 790512                             | 11712476     | 6.75%          |

We assess the efficiency of mapping of read overlapping AAV ITR extremities when aligning with ContaVect, either with separated AAV and plasmid backbone references (one fasta for each), or with a unique merged reference corresponding to the complete vector plasmid. To do so, reads overlapping both left and right ITR were counted and compared with reads overlapping the rAAV genome. This was done directly from BAM files using a script based on pysam 0.8.1 (htslib interface for python). For the separated AAV and Backbone references, the coordinates of left ITR, right ITR and rAAV genome in the reference “Cassette-AAV-CMV-GFP-hTK” are [1,130], [4665,4794] and [1,4794], respectively. For the fused AAV and Backbone reference, the coordinates of left ITR, right ITR and rAAV genome in the reference “SSV9K2-CMV-GFP-HygroTK-bGHpA” are [1192,1321], [5856,5985] and [1192,5985], respectively.

**Table S8. Index sequences**

| Sample id           | Index Sequences |             |
|---------------------|-----------------|-------------|
|                     | Replicate 1     | Replicate 2 |
| CsCl -DNase         | TGACCA          | CGATGT      |
| CsCl +DNase         | GCCAAT          | TGACCA      |
| AVB -DNase          | CTTGTA          | ACAGTG      |
| AVB +DNase          | GTGAAA          | GCCAAT      |
| IEX -DNase          | ACAGTG          | CAGATC      |
| IEX +DNase          | CAGATC          | CTTGTA      |
| Negative control    | CGATGT          | AGTCAA      |
| Internal normalizer | AGTCAA          | GTGAAA      |

Indexed “all in one” adapters compatible with Illumina TrueSeq protocol were obtained from Sigma-Aldrich (Oligonucleotide sequences 2007-2014 Illumina, Inc. All rights reserved):

P5 adapter 5’\_AATGATACGGCGACCACCGAGATCTACACTCTTCCCTACACGACGCTCTCCGATC\*T\_3’

P7 adapter 5’\_P-GATCGGAAGAGCACACGTCTGAACTCCAGTCACNNNNNNATCTCGTATGCCG TCTTCTGCTTG\_3’

5’: 5’ DNA end, 3’: 3’ DNA end, \*: phosphorothioate linkage, P: phosphorylated end.

P7 adapter contains a six bases index used to identify samples after multiplexing (NNNNNN in P7 sequence), as described by Illumina. The table summarizes the indexes used for the 2 replicates of each samples. Indexes were randomized between the two SSV-Seq runs to avoid eventual index sequence bias.

## **SUPPLEMENTARY MATERIAL AND METHODS**

### **rAAV vectors production and purification**

All of the vectors were manufactured and characterized at INSERM UMR 1089 Vectors Production Core (Nantes, France), except for the Immune affinity chromatography step, which was performed at Genethon (Evry, France).

#### **Vectors production**

The rAAV 2/8 CMVp-eGFP-hygroTK-bGHpA was produced by transfecting HEK-293 cells from the laboratory working bank with the pSSV9-CMV-GFP-ires-HTK-bGHpA vector plasmid and the pDP8-Kana helper plasmid (containing AAV2 rep, AAV8 cap, and adenovirus E2A, VA RNA and E4 genes) as described in [Ayuso et al. 2014, \*Hum. Gene Ther.\* 25: 977–987](#). Similar to GMP production protocol, HEK-293 cells were cultured in DMEM medium w/o red phenol, with 4,5g/l glucose and 10% gamma-irradiated FBS (HyClone). Plasmids transfection was performed with jetPEI (PolyPlus Transfection Illkirch, France) on a total of three 10-chambers CellBIND Surface CellSTACK (Corning Life Sciences), in DMEM medium w/o red phenol, with 4,5g/l glucose (HyClone) and w/o FBS. After 72 h, the cells and the culture supernatant were collected and the crude bulk was split in three equal volumes for subsequent purifications.

#### **Cesium Chloride (CsCl) gradients ultracentrifugation purification**

The crude bulk was clarified by centrifugation, precipitated with a polyethylene glycol (PEG), treated with Benzonase Nuclease (Merck-Millipore) and purified by double Cesium Chloride gradient (CsCl) for enrichment in full particles, as extensively described in [Ayuso et al. 2010, \*Gene Ther.\* 17: 503–510](#).

#### **Ion-exchange chromatography (IEX) purification**

The crude bulk was clarified by filtration using Millipore Opticap XL2 Polysep disposable capsule filters (Merck-Millipore), and purified by three successive ion exchange chromatography steps:

- An anionic membrane, Mustang® Q XT Ion Exchange Chromatography Capsules (Pall Corporation). The clarified bulk was loaded with 20mM Tris buffer to reduce salinity to 40 mM and adjusted to pH 8.0 to capture the rAAV vector particles and then eluted with increasing concentration of 300 mM NaCl
- A multimodal weak cation exchanger XK26/20 column (GE Healthcare Life sciences). The previously eluted volume was loaded with 50mM MES buffer to reduce salinity to 30 mM and adjusted to pH 6,0 to capture the rAAV vector particles and eluted with increasing concentration of 600 mM NH<sub>4</sub>Cl
- An anionic monolith columns CIMmultus QA 80ml (Bia Separations). The previously eluted volume was loaded with 20mM Tris buffer to reduce salinity to 40 mM and adjusted to pH 8.5 to capture the rAAV vector particles and then eluted with increasing concentration of 300 mM NaCl

## *Supplementary material*

All three columns were already used several times for rAAV purification before this study, but were sanitized prior usage with the following protocol: 2 to 3 column volumes (CV) of water, incubation with 1N NaOH for 30 to 60 min, 2 to 3 CV of water, 5 to 10 CV of Tris NaCl buffer, 2 to 3 CV of water, 5 to 10 CV of EtOH 20%.

### **Immune affinity chromatography purification**

The crude bulk was clarified by centrifugation, treated with Benzonase Nuclease (Merck-Millipore) and purified by immune affinity chromatography with a single AVB Sepharose High Performance column (GE Healthcare Life sciences) as described in [Smith et al, 2009, \*Mol. Ther. J. Am. Soc. Gene Ther.\* \*\*17\*\*: 1888–1896.](#)

Similar to IEX chromatography, the column was already used several times for rAAV purification before this study, but was sanitized prior usage with the following protocol: 2 to 3 column volumes (CV) of water, incubation with 0.1M H<sub>3</sub>PO<sub>4</sub> (phosphoric acid) + 1M NaCl for 20 min, 2 to 3 CV of water, 5 to 10 CV of PBS buffer, 2 to 3 CV of water, 5 to 10 CV of EtOH 20%.

### **Concentration and formulation**

The three rAAV batches obtained by CsCl, IEX and AVB purifications were concentrated by tangential flow filtration (TFF) with a 100 kDa molecular weight cut-off (GE Healthcare). The concentrated vectors were formulated in Dulbecco's phosphate-buffered saline (Lonza, Verviers, Belgium) containing 0.001% Pluronic F-68 (Gibco/Life Technologies).

## **Comparative efficacy of DNases**

### **DNase treatment**

Samples were treated with 20U of DNase I (Roche, Basel, Switzerland), 10U of TurboDNase (Life Technologies, Carlsbad, CA, USA), 250U of Benzonase (Merck, Billerica, MA, USA) or a mix of 4U of Plasmid-Safe (PS) and 10U of Baseline-ZERO (BL). They were incubated 2 hours at 37°C in a final volume of 200µL containing the buffers recommended by each manufacturers or an optimized buffer for our DNases mix (Baseline ZERO buffer, supplemented with 1mM of ATP). The reaction was stopped with 3mM of EDTA 30min at 75°C.

### **Quant-iT PicoGreen quantification**

A working solution of the Quant-iT PicoGreen dsDNA reagent (Life technologies) was prepared by diluting the concentrated DMSO solution 400-fold in TE. Samples and phage-λ DNA stock solution were diluted in TE buffer (10mM Tris-HCl, 1mM EDTA, pH 7.5) to a final volume of 10 µL before the addition of 90 µL of the working solution. After 5 minutes at room temperature, protected from light, fluorescein intensities were quantified using a fluorescence plate reader (VictorX3, Perkin Elmer). DNA concentration of each sample was determined from the standard curve generated by phage-λ dilutions.

## **Quality controls of rAAV productions**

### **Particle titer**

The particles concentration was determined using the Progen AAV8 Titration ELISA kit (Progen Biotechnik GmbH, Heidelberg, Germany) according to the manufacturer's instructions.

### **Vector genome and DNA contaminants quantification**

Each rAAV vector was treated with 4U of Plasmid-Safe and 10U of Baseline-ZERO for 2h at 37°C. The reaction was stopped with 3mM of EDTA for 30 min at 75°C. DNA extraction was carried out using the High Pure Viral Nucleic Acid kit (Roche). Then, the vector genome concentration was determined by Taqman qPCR targeting the ITRs (ITR2), the transgene (GFP1 and GFP2), the promoter (CMVp) or the polyadenylation signal (bGHpA). DNA contaminants were also quantified by qPCR targeting plasmid backbone (KanaR), helper plasmid (cap8, rep2 and E4) and human genome (human ALB1). qPCR reactions were performed with the StepOne Plus Real-time PCR system (Life Technologies) in a final volume of 20µL using the Premix Ex Taq kit (Takara Bio Inc., Otsu, Japan). Conditions for each reaction are detailed in **Table S9**, following MIQE guidelines ([Bustin,S.A. et al. \(2009\). Clin. Chem., 55, 611–622.](#)).

### **Protein purity and identity**

The purity and identity were evaluated by SDS-PAGE, using Coomassie Blue (Imperial™ Protein Stain, Thermo Fisher Scientific Inc., Waltham, MA, USA) and silver staining (PlusOne™ Silver Stain kit, Protein, GE Healthcare, Little Chalfont, United Kingdom) according to the manufacturer's recommendations. The purity relative to non-vector impurities visible on stained gels was determined using GeneTools (Syngene, Frederick, MD, USA).

## **In process NGS libraries preparation controls**

### **Controls of second strand synthesis**

A reaction containing ¼ fluorescein-12-dUTP and ¾ dTTP (Thermo Fisher Scientific Inc.), instead of dTTP alone, was performed similar to the protocol described in the manuscript material and methods. The mix was then purified using NucleoSpin®Gel and PCR Clean-up kit (Macherey-Nagel) and the fluorescence intensity was quantified using Victor X3 (Perkin Elmer).

### **DNA quantification**

Aliquots were sampled after each major step of SSV-Seq protocol, (1) after the proteinase K treatment, (2) after the rAAV DNA extraction and (3) after the double strand synthesis purification. From these samples, rAAV genomes and plasmid backbone contaminants were quantified by Taqman qPCR targeting BGHpA sequence and KanaR sequence, respectively.

## *Supplementary material*

### **Control of NGS library preparation**

The size of fragments was verified after sonication and after NGS library preparation by the Agilent 2100 Bioanalyzer system using High sensitivity DNA chips (Agilent Technologies, Santa Clara, CA, USA), according to the manufacturer's guidelines.
